# Supplementary material for: Kca3.1 Activation Via P2y2 Purinergic Receptors Promotes Human Ovarian Cancer Cell (Skov-3) Migration
Source: PubMed Central journal article supplement (PMC5489490; doi:10.1038/s41598-017-04292-6), 2017-06-28
Supplement: 41598_2017_4292_MOESM1_ESM.pdf [file 41598_2017_4292_MOESM1_ESM.pdf]

# K<sub>Ca</sub>3.1 ACTIVATION VIA P2Y<sub>2</sub> PURINERGIC RECEPTORS PROMOTES HUMAN OVARIAN CANCER CELL (SKOV-3) MIGRATION

By

Robles-Martínez L., Garay E., Martel-Gallegos M.G., Cisneros-Mejorado A., Pérez-Montiel D., Lara A. & Arellano R.O.

Supplementary Figure 1 (S1)

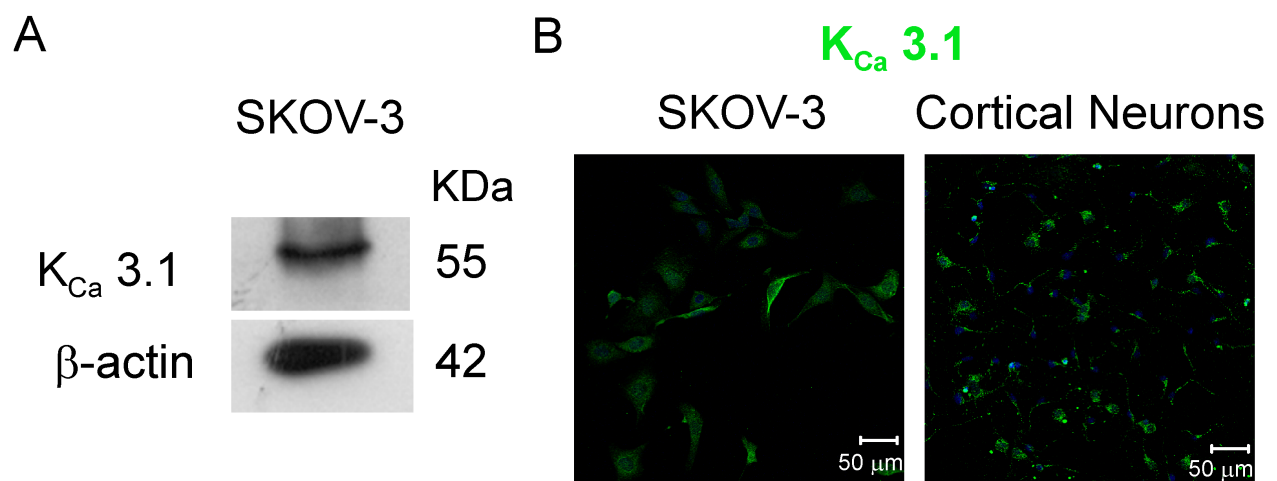

**Figure S1. K<sub>Ca</sub>3.1 channel protein expression in SKOV-3 cells.**

**A.** K<sub>Ca</sub>3.1 was detected in protein homogenates of SKOV-3 cells as a band of 55 KDa by Western blot; β-actin was detected in the same samples as control. **B.** The same antibody against K<sub>Ca</sub>3.1 in **A** was used to detect the protein by immunofluorescence in SKOV-3 cells, and as positive control, in cortical neurons maintained in culture.

Supplementary Figure 2 (S2)

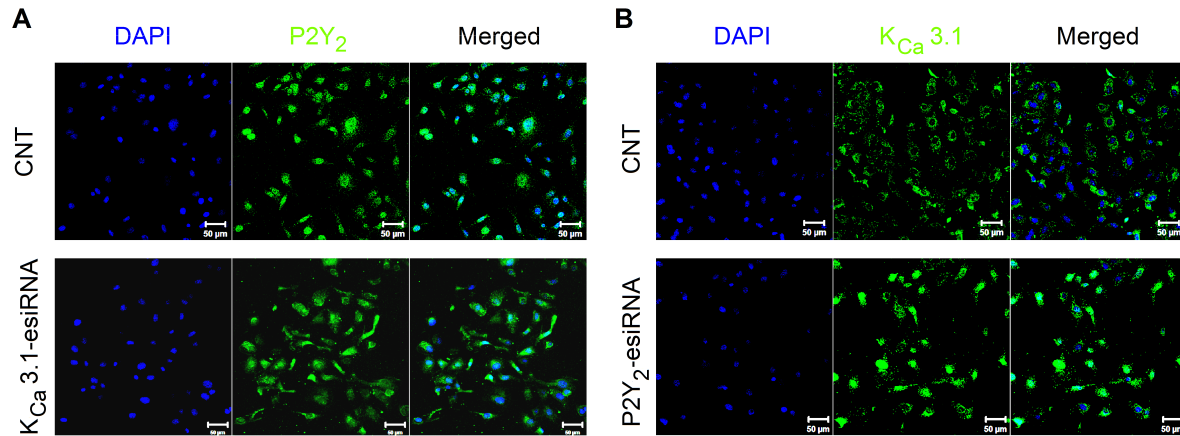

**Figure S2. P2Y<sub>2</sub> and K<sub>Ca</sub>3.1 protein expression in esiRNA transfected SKOV-3 cells.**

**A.** Analysis by immunocytochemistry after 48 h of esiRNA treatment in control (CNT) and K<sub>Ca</sub>3.1-esiRNA-treated groups. Panels show the fluorescence signal for DAPI (blue) in the first column, the signal obtained with a specific antibody against P2Y<sub>2</sub> receptor protein (in green) in the second column, and the corresponding merged image. **B.** Similar analysis was made in P2Y<sub>2</sub>-esiRNA-treated cells using an antibody against K<sub>Ca</sub>3.1 channel protein.

Supplementary Figure 3 (S3)

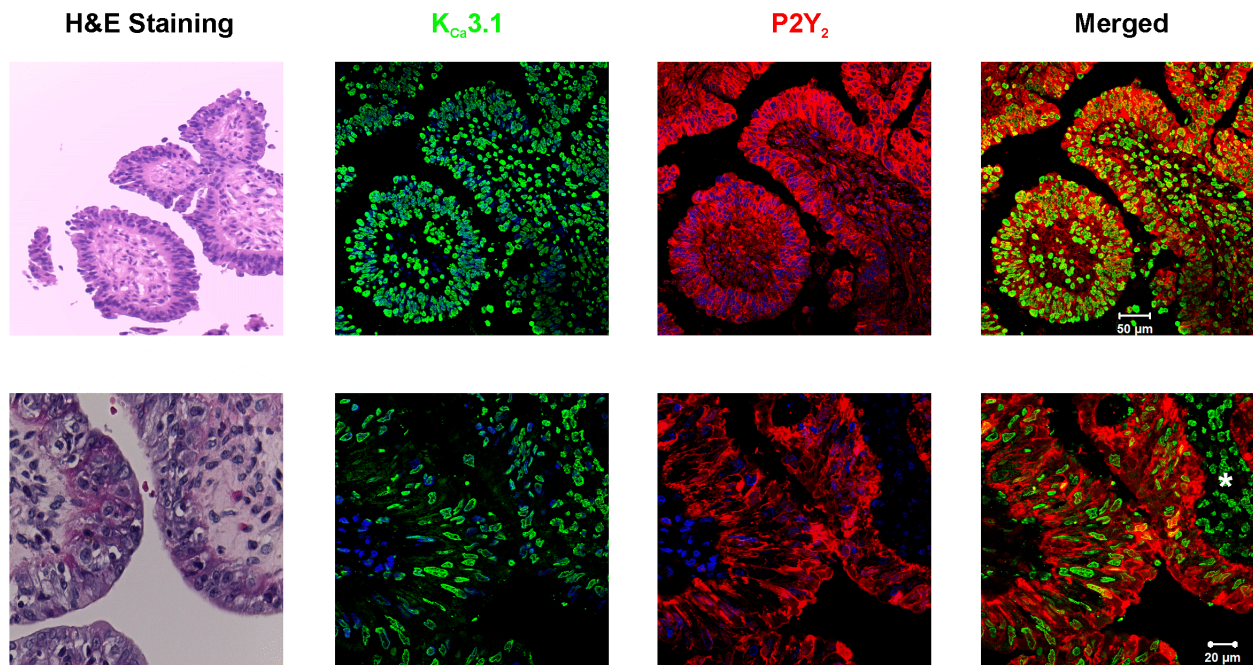

**Figure S3. Co-localization of P2Y<sub>2</sub> receptor and K<sub>Ca</sub>3.1 channel in human ovarian carcinoma.**

Expression of P2Y<sub>2</sub> receptors and K<sub>Ca</sub>3.1 channels in slices from human ovarian carcinoma evaluated immunohistochemically as in Figure 8. Patient 2 (IC16-4831-1) diagnosed with high-grade papillary serous carcinoma (first row), and Patient 3 (IC11-7381) with endometrioid G3-type carcinoma, respectively.
